# Supplementary material
Source: MDPI journal article supplement (https://www.mdpi.com/2073-4395/10/7/927)
Supplement: s1 [file s1]

## Sheet: Лист1
Table S1. The comparison of height reduction and agronomic performance for Rht13 in common wheat as revealed in different studies
Trait	Divashuk et al., 2020	Loskutova, 1996	Maddocks 2008	Mutlucan 2016	Rebetzke et al., 2011	Rebetzke et al., 2012	Wang et al., 2014 F2:3	Wang et al., 2014 F3:4	Wang et al., 2015 F2	Wang et al., 2015 F2:3	Wang et al., 2015 F3:4	Drouyer 2008
location	Moscow, Russia	Pushkin Experimental Station, Leningrad Oblast	Gininderra Experiment Station (Australia)	Fort Collins, Colorado (USA)	Ginninderra Experiment Station, Griffith, Stockinbingal (Australia)	Ginninderra Experiment Station, Griffith, Stockinbingal (Australia)	Yangling, Shaanxi, China	Yangling, Shaanxi, China	Yangling, Shaanxi, China	Yangling, Shaanxi, China	Yangling, Shaanxi, China	glasshouse experiment
plant material	spring wheat, Lan5 х Lan13	spring wheat, Lan13 (lines-analogues based on spring wheat Mironovskaya 808)	spring wheat, Lan13 Х Mironovskaya 808	Magsilva-15 (Rht13) x Scholar	spring wheat, Chuanmai 18 (Rht8) X Mafnig M1 (Rht13)	spring wheat, Chuanmai 18 (Rht8) X Mafnig M1 (Rht13)	winter wheat, Xinong223 (Rht-D1b) x Magnif M1 (Rht13)	winter wheat, Xinong223 (Rht-D1b) x Magnif M1 (Rht13)	winter wheat, Jinmai47 (Rht8) x Magnif M1 (Rht13)	winter wheat, Jinmai47 (Rht8) x Magnif M1 (Rht13)	winter wheat, Jinmai47 (Rht8) x Magnif M1 (Rht13)	spring wheat, Lan13 (lines-analogues based on spring wheat Mironovskaya 808)
Plant height (PH), cm
wild type (rht13)	74.9		122.6	101.9	106	112	92.2	89.8	94.5	112.4	94
Rht13	61.9		71.8	89.8	68	73	76.4	75.1	58.3	83	69.2
Contrast Rht13Rht13 vs rht13rht13	-13		-50.8	-12.1	-38	-39	-15.8	-14.7	-36.2	-29.4	-24.8
Contrast Rht13Rht13 vs rht13rht13 (%)	-0.173565	-0.44	-0.414356	-0.118744	-0.358491	-0.348214	-0.171367	-0.163697	-0.383069	-0.261566	-0.26383
1st upper internode (peduncle), cm
wild type (rht13)	28.4		42.3		39		29.8	27.2	32.3	33.2	27.3
Rht13	24.3		19.3		20		28.5	27.4	16.3	24.2	19.5
Contrast Rht13Rht13 vs rht13rht13	-4.1		-23		-19		-1.3	0.2	-16	-9	-7.8
Contrast Rht13Rht13 vs rht13rht13 (%)	-0.144366		-0.543735		-0.487179		-0.0436242	0.00735294	-0.495356	-0.271084	-0.285714
proportion wild type (rht13) (internode length/plant length)	0.379172		0.345024	0	0.367925	0	0.32321	0.302895	0.341799	0.295374	0.290426
proportion Rht13 (internode length/plant length)	0.392569		0.268802	0	0.294118	0	0.373037	0.364847	0.279588	0.291566	0.281792
contribution (internode deacrase/plant length decrease)	0.315385		0.452756	0	0.5	0	0.0822785	-0.0136054	0.441989	0.306122	0.314516
2nd upper internode, cm
wild type (rht13)	16.6		27.9		26		22	21.6		27.8	22.7
Rht13	11.3		8.71		13		18.5	16.2		20.2	16
Contrast Rht13Rht13 vs rht13rht13	-5.3		-19.19		-13		-3.5	-5.4		-7.6	-6.7
Contrast Rht13Rht13 vs rht13rht13 (%)	-0.319277		-0.687814		-0.5		-0.159091	-0.25		-0.273381	-0.295154
proportion wild type (rht13) (internode length/plant length)	0.221629		0.227569	0	0.245283	0	0.238612	0.240535	0	0.247331	0.241489
proportion Rht13 (internode length/plant length)	0.182553		0.121309	0	0.191176	0	0.242147	0.215712	0	0.243373	0.231214
contribution (internode deacrase/plant length decrease)	0.407692		0.377756	0	0.342105	0	0.221519	0.367347	0	0.258503	0.270161
3rd upper internode, cm		3rd and 4th internodes showed the highest decrease
wild type (rht13)	10.5		19.2		16		13.9	15.6		18.4	14.6
Rht13	8.1		12.7		10		11.8	11.8		14.7	10.5
Contrast Rht13Rht13 vs rht13rht13	-2.4		-6.5		-6		-2.1	-3.8		-3.7	-4.1
Contrast Rht13Rht13 vs rht13rht13 (%)	-0.228571		-0.338542		-0.375		-0.151079	-0.24359		-0.201087	-0.280822
proportion wild type (rht13) (internode length/plant length)	0.140187		0.156607		0.150943		0.150759	0.173719	0	0.163701	0.155319
proportion Rht13 (internode length/plant length)	0.130856		0.17688		0.147059		0.15445	0.157124	0	0.177108	0.151734
contribution (internode deacrase/plant length decrease)	0.184615		0.127953		0.157895		0.132911	0.258503	0	0.12585	0.165323
2nd lower internode, cm
wild type (rht13)	8.4		15.5					7.6			6.9
Rht13	6.3		13.1					4.7			5.4
Contrast Rht13Rht13 vs rht13rht13	-2.1		-2.4					-2.9			-1.5
Contrast Rht13Rht13 vs rht13rht13 (%)	-0.25		-0.154839					-0.381579			-0.217391
proportion wild type (rht13) (internode length/plant length)	0.11215		0.126427					0.0846325		0	0.0734043
proportion Rht13 (internode length/plant length)	0.101777		0.182451					0.0625832		0	0.0780347
contribution (internode deacrase/plant length decrease)	0.161538		0.0472441					0.197279		0	0.0604839
1st lower internode, cm
wild type (rht13)	4.7		6.2								3.3
Rht13	3.6		5.79								3.2
Contrast Rht13Rht13 vs rht13rht13	-1.1		-0.41								-0.1
Contrast Rht13Rht13 vs rht13rht13 (%)	-0.234043		-0.066129								-0.030303
proportion wild type (rht13) (internode length/plant length)	0.0627503		0.050571					0	0	0	0.0351064
proportion Rht13 (internode length/plant length)	0.0581583		0.0806407					0	0	0	0.0462428
contribution (internode deacrase/plant length decrease)	0.0846154		0.00807087					0	0	0	0.00403226
Main spike length (MSL), cm
wild type (rht13)	9		9.72	13.6	10.9		9.4	10	11.3	10.6	12.3
Rht13	9.2		9.9	13.2	10.7		9.6	10.8	10.2	10	11.2
Contrast Rht13Rht13 vs rht13rht13	0.2		0.18	-0.4	-0.2		0.2	0.8	-1.1	-0.6	-1.1
Contrast Rht13Rht13 vs rht13rht13 (%)	0.0222222	-0.16	0.0185185	-0.0294118	-0.0183486		0.0212766	0.08	-0.0973451	-0.0566038	-0.0894309
Spikelet number per spike (SN)
wild type (rht13)	15.2		17.78	22.2			18.3	18.3		19.3	20
Rht13	15		17.3	22.1			18.6	18.7		18	17.5
Contrast Rht13Rht13 vs rht13rht13	-0.2		-0.48	-0.1			0.3	0.4		-1.3	-2.5
Contrast Rht13Rht13 vs rht13rht13 (%)	-0.0131579	-0.02	-0.0269966	-0.0045045			0.0163934	0.0218579		-0.0673575	-0.125
Grain number per main spike (GN)
wild type (rht13)	28.9		44.8	50.6		36.1	55.8	56.7	43	32	54.5
Rht13	30.2		44.6	52.4		36.9	51.9	54.7	35.6	25.7	44.9
Contrast Rht13Rht13 vs rht13rht13	1.3		-0.2	1.8		0.8	-3.9	-2	-7.4	-6.3	-9.6
Contrast Rht13Rht13 vs rht13rht13 (%)	0.0449827	0.13	-0.00446429	0.0355731		0.0221607	-0.0698925	-0.0352734	-0.172093	-0.196875	-0.176147
Grain number per area, t/m2
wild type (rht13)					11311
Rht13					14654
Contrast Rht13Rht13 vs rht13rht13					3343
Contrast Rht13Rht13 vs rht13rht13 (%)					0.295553
significance					singnificant
Number of fertile tillers per plant (FT)
wild type (rht13)	2.5						13.4	7.8		13.3	10.1
Rht13	2.9						14	8.7		12.5	9.6
Contrast Rht13Rht13 vs rht13rht13	0.4						0.6	0.9		-0.8	-0.5
Contrast Rht13Rht13 vs rht13rht13 (%)	0.16	0					0.0447761	0.115385		-0.0601504	-0.049505
Number of fertile tillers per area, pcs/ha
wild type (rht13)					306
Rht13					375
Contrast Rht13Rht13 vs rht13rht13					69
Contrast Rht13Rht13 vs rht13rht13 (%)					0.22549
significance					singnificant
Thousand grain weight (TGW), g
wild type (rht13)	52.07		18.6	27.6	4.04	44		50.8			43.34
Rht13	46.99		18.5	31.5	3.76	41		39.3			43.11
Contrast Rht13Rht13 vs rht13rht13	-5.08		-0.1	3.9	-0.28	-3		-11.5			-0.23
Contrast Rht13Rht13 vs rht13rht13 (%)	-0.097561	-0.07	-0.00537634	0.141304	-0.0693069	-0.0681818		-0.226378			-0.00530688
Grain weight per main spike (GWS), g
wild type (rht13)	1.5
Rht13	1.4
Contrast Rht13Rht13 vs rht13rht13	-0.09
Contrast Rht13Rht13 vs rht13rht13 (%)	-0.06	-0.06
Biomass (BM), g
wild type (rht13)	2.6							30.4			37.7
Rht13	2.4							22.9			27.2
Contrast Rht13Rht13 vs rht13rht13	-0.2							-7.5			-10.5
Contrast Rht13Rht13 vs rht13rht13 (%)	-0.0769231							-0.246711			-0.278515
Biomass, t/ha
wild type (rht13)					13.59	12.3					37.7
Rht13					15.45	13.1					27.2
Contrast Rht13Rht13 vs rht13rht13					1.86	0.8					-10.5
Contrast Rht13Rht13 vs rht13rht13 (%)					0.136865	0.0650407					-0.278515
Grain weight per plant, g
wild type (rht13)								12.74			15.5
Rht13								9.45			11
Contrast Rht13Rht13 vs rht13rht13								-3.29			-4.5
Contrast Rht13Rht13 vs rht13rht13 (%)								-0.258242			-0.290323
significance								singnificant			singnificant
Harvest index (HI)
wild type (rht13)	0.556					0.34		40.8			41.3
Rht13	0.557					0.365		41.2			40
Contrast Rht13Rht13 vs rht13rht13	0.001					0.025		0.4			-1.3
Contrast Rht13Rht13 vs rht13rht13 (%)	0.00179856					0.0735294		0.00980392			-0.031477
Yield, t/ha or dt/ha
wild type (rht13)				50.6	4.57	4
Rht13				52.4	5.51	4.7
Contrast Rht13Rht13 vs rht13rht13				1.8	0.94	0.7
Contrast Rht13Rht13 vs rht13rht13 (%)		-0.12		0.0355731	0.205689	0.175
Days to heading			Dwarf Rhtl3 NILs became significantly different {P<0.05) from WT at a point a few days before the end of booting (Zadok 49), approximately 10 days before 50% ear emergence (Zadok 55).									Rht13 line grew at a similar rate to the tall until around the booting stage. From the beginning of ear emergence, height of the Rht13 NIL increased much slower than the tall
wild type (rht13)	50.8
Rht13	49.3
Contrast Rht13Rht13 vs rht13rht13	-1.5
Contrast Rht13Rht13 vs rht13rht13 (%)	-0.0295276
Days to anthesis
wild type (rht13)	52.1
Rht13	50.5
Contrast Rht13Rht13 vs rht13rht13	-1.6
Contrast Rht13Rht13 vs rht13rht13 (%)	-0.0307102
Statistically significant differences at p < 0.05 are shown in red
